# Supplementary material for: Clarity improvement of the discoloration boundary and detection of Hg2+ ions by using a polystyrene nanoparticle-modified paper-based microdevice
Source: Royal Society of Chemistry journal article supplement (doi:10.1039/d3ay00174a), 2023-01-01
Supplement: d3ay00174a1.pdf [file d3ay00174a1.pdf]

## Supplementary data

# Clarity improvement of discoloration boundary and detection of $\text{Hg}^{2+}$ ions by polystyrene nanoparticle-modified paper-based microdevice

*Jingcheng Xiao, Jingjing Jiang, Zexu Zhao, Jiahao Guo and Jinyi Wang\**

College of Chemical & Pharmacy, Northwest A&F University, Yangling, Shaanxi 712100, P. R. China

\*Phone: + 86-29-870 825 20. Fax: + 86-29-870 825 20. E-mail: [jywang@nwsuaf.edu.cn](mailto:jywang@nwsuaf.edu.cn).

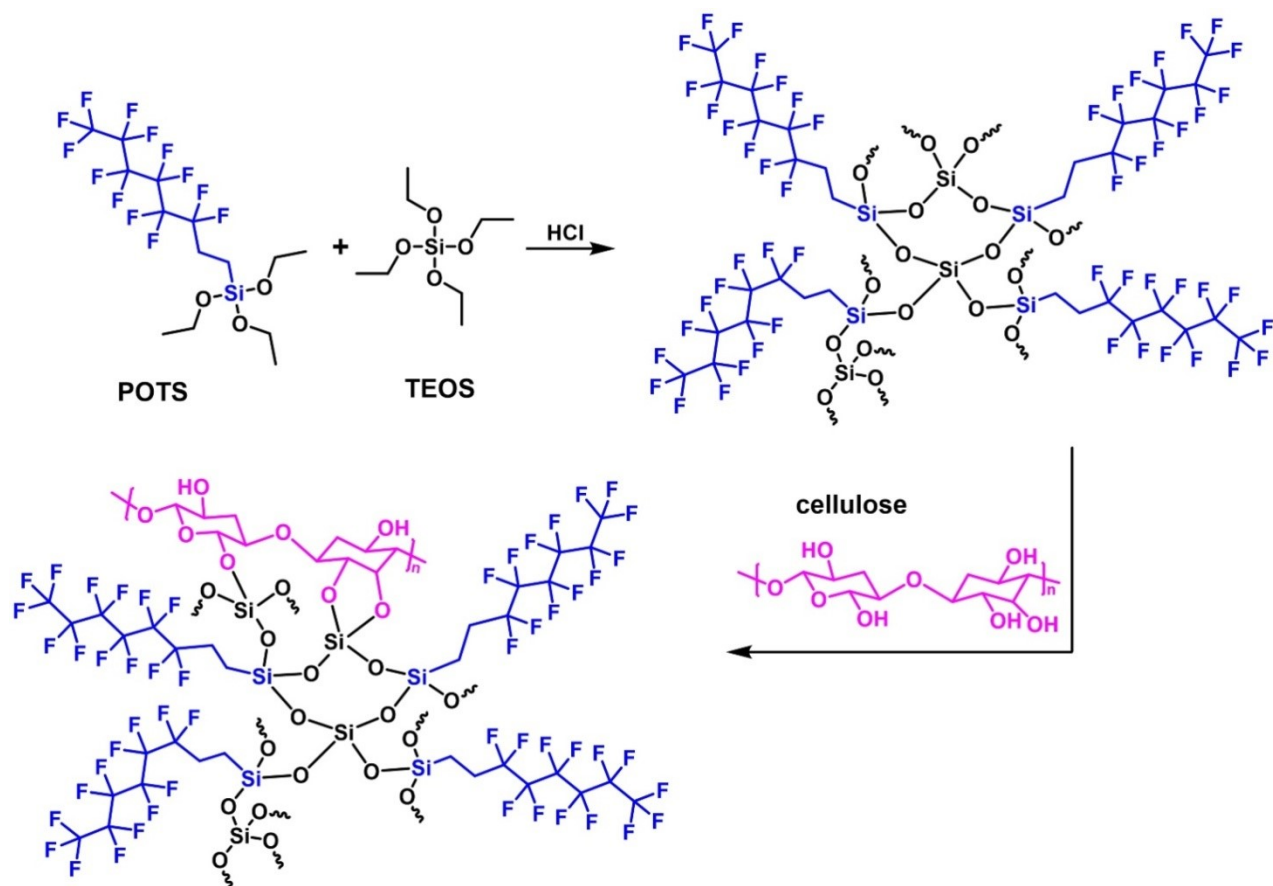

**Figure S1.** Preparation of the hydrophobic ink and its reaction with cellulose.

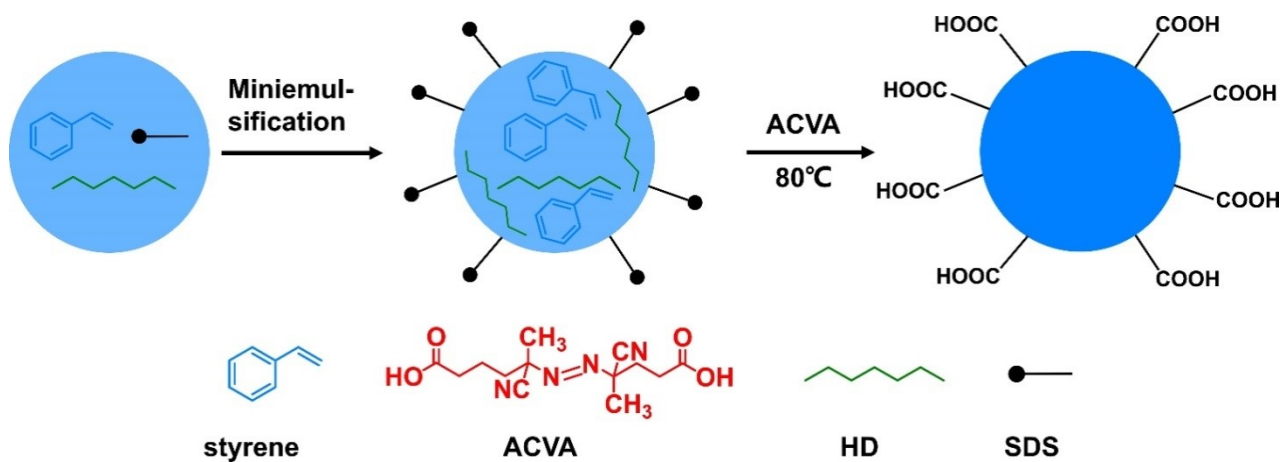

**Figure S2.** Schematic illustration of the PS NPs preparation route.

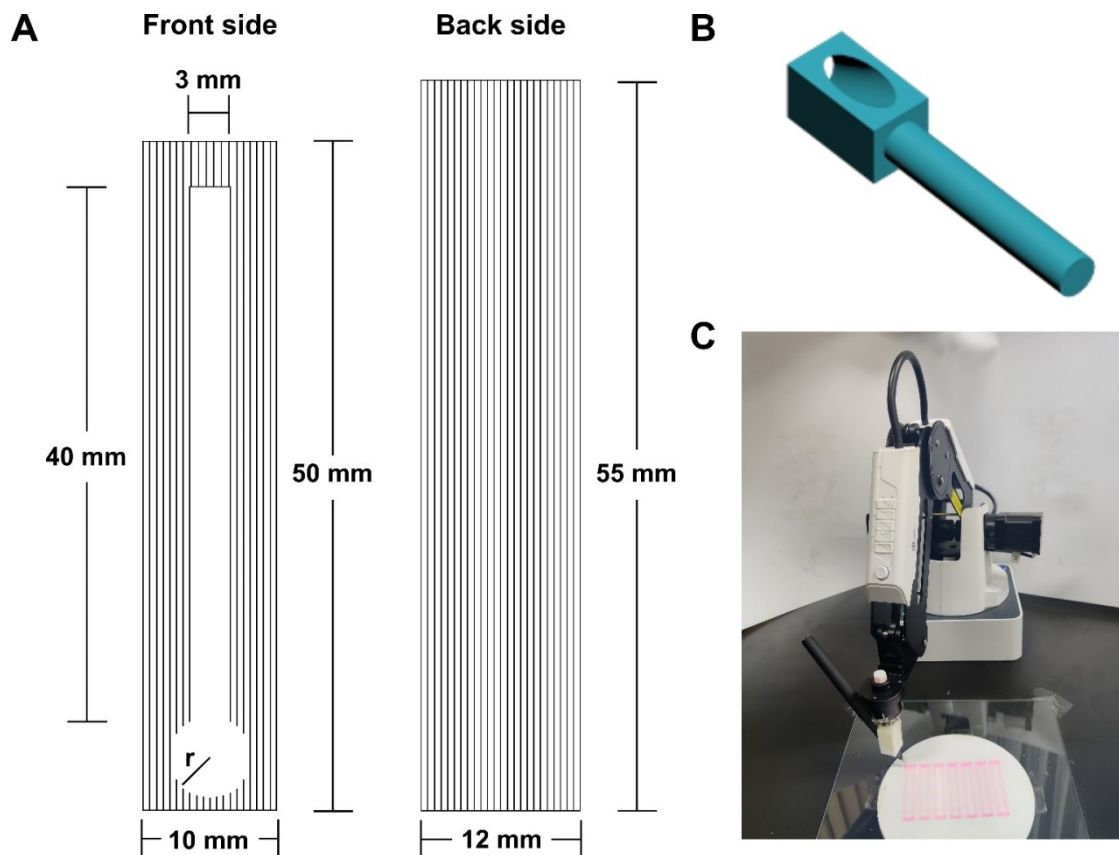

**Figure S3.** Design illustration of (A) single-channel  $\mu$ PAD ( $r = 2.5$  mm) and (B) pen-holding assembly. (C) Working image of the robotic arm with pen-holding assembly.

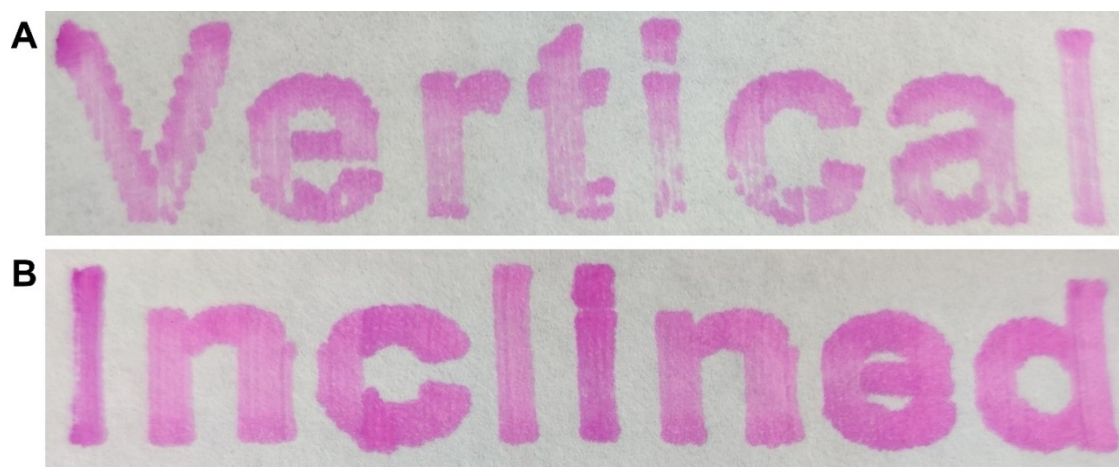

**Figure S4.** Clamping method optimization. (A) Vertical clamping to write the word 'Vertical'. (B) Inclined clamping to write the word 'Inclined'.

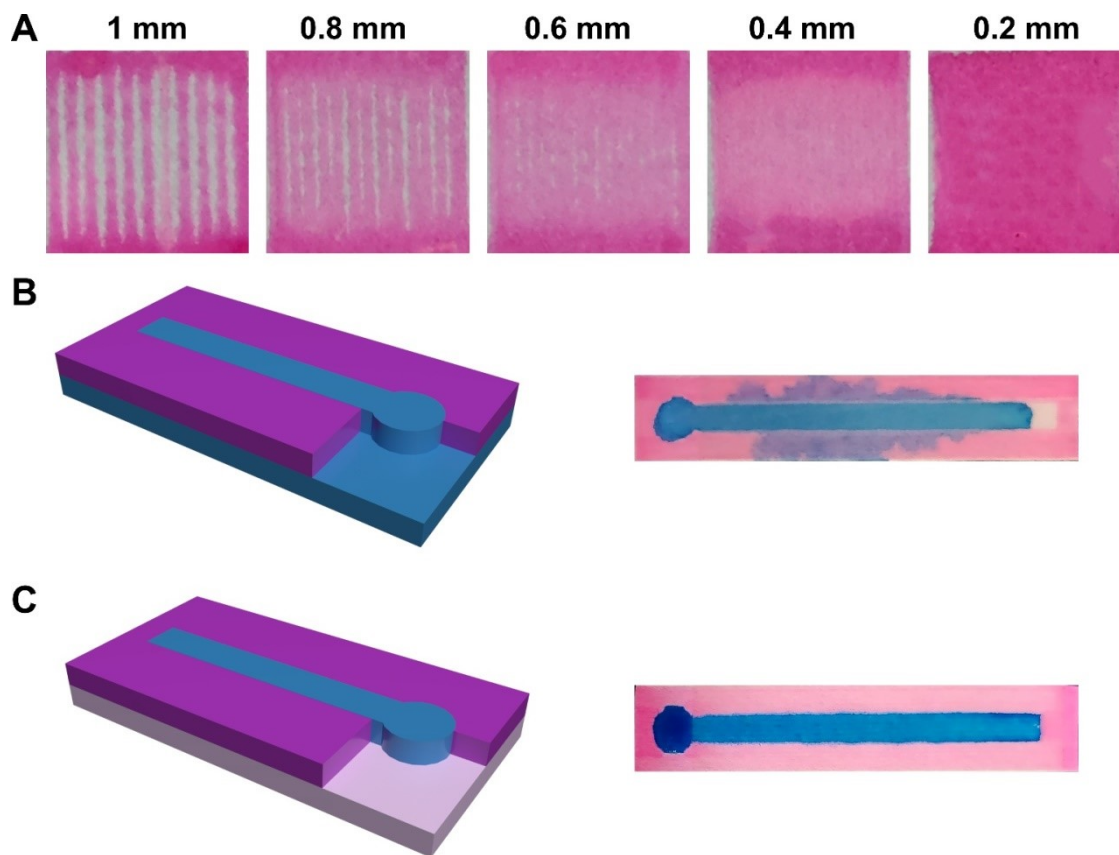

**Figure S5.** (A) Optimization of the drawing intervals. Solution flow of the  $\mu$ PADs drawn on the top side (B) and both sides (C).

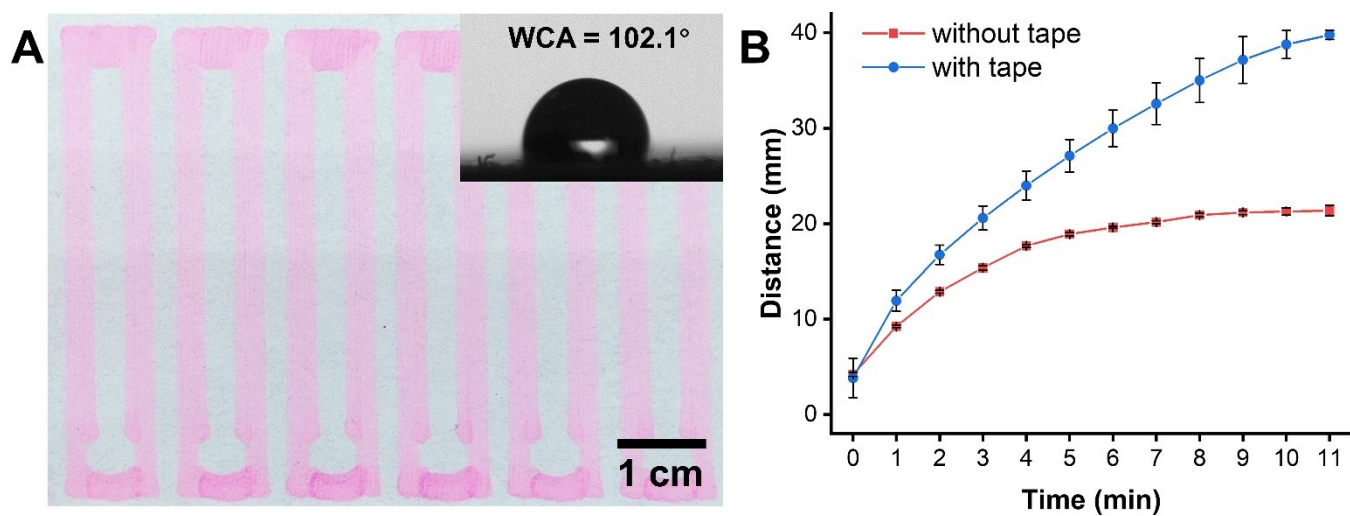

**Figure S6.** (A) Optical image of  $\mu$ PAD (inset: water contact angle image of the hydrophobic region). (B) Variation of the flow distance with and without tape encapsulation.

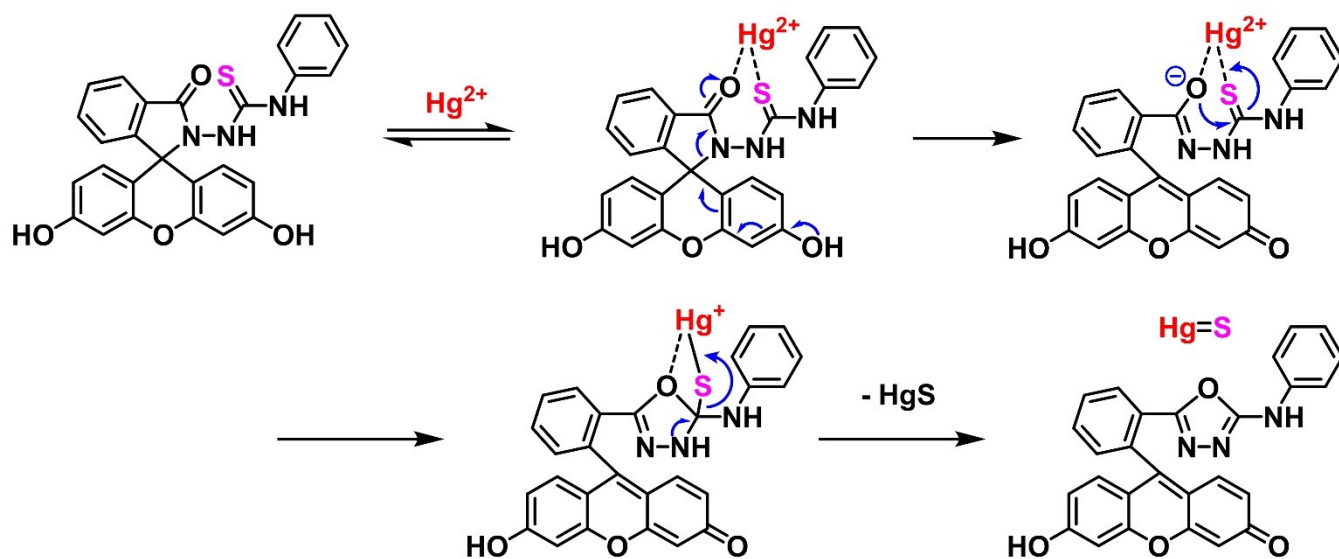

**Figure S7.** The reaction mechanism of  $\text{Hg}^{2+}$  ions detecting with FLPI.

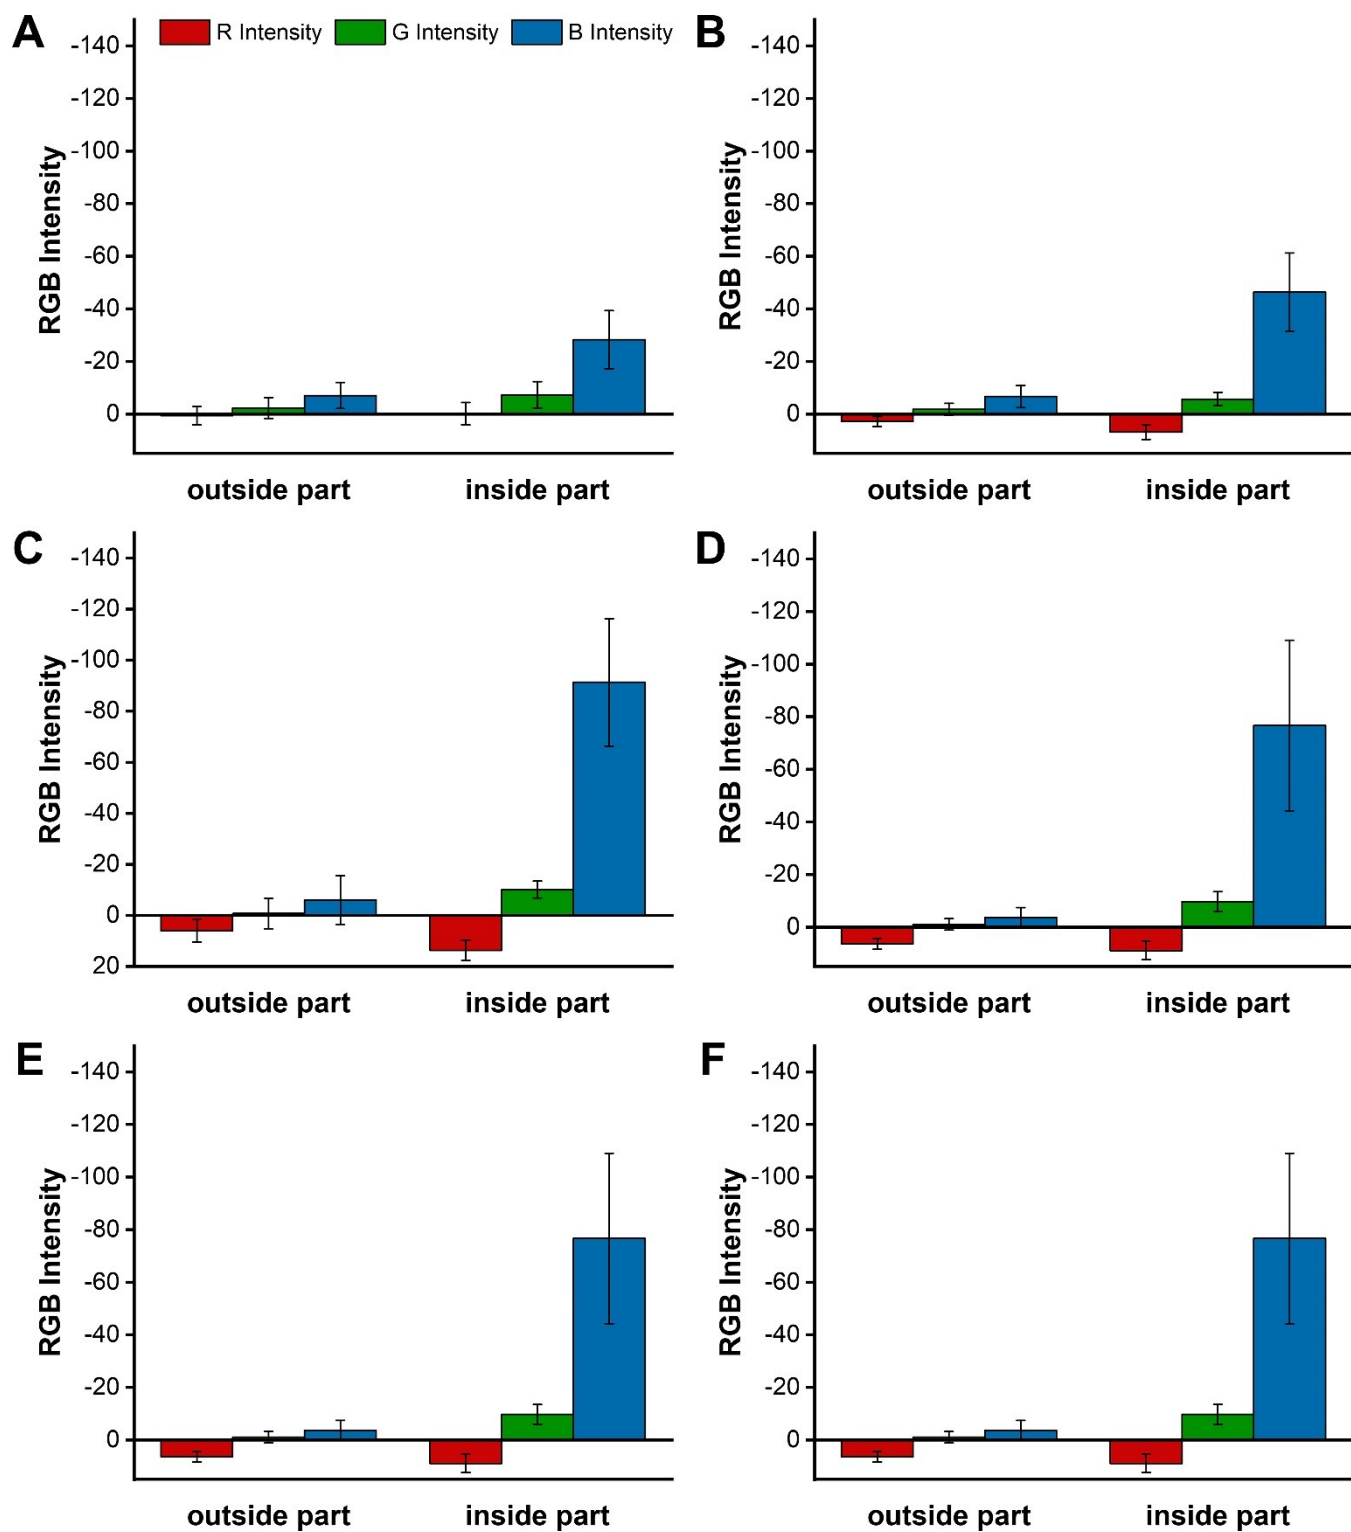

**Figure S8.** RGB values of the inside and outside part after modified  $\mu$ PAD with (A) 0  $\mu$ L, (B) 10  $\mu$ L, (C) 20  $\mu$ L, (D) 30  $\mu$ L, (E) 40  $\mu$ L, and (F) 50  $\mu$ L of PS NPs suspension.

**Table S1.** Detection of Hg<sup>2+</sup> ions in real samples.

| Sample       | Added<br>( $\mu\text{M}$ ) | PS- $\mu\text{PAD}$        |                        | LC-AFS                     |                        |
|--------------|----------------------------|----------------------------|------------------------|----------------------------|------------------------|
|              |                            | Found<br>( $\mu\text{M}$ ) | Recovery $\pm$ RSD (%) | Found<br>( $\mu\text{M}$ ) | Recovery $\pm$ RSD (%) |
| Tap<br>water | 250                        | 243.5                      | 97.4 $\pm$ 8.9         | 246.7                      | 98.7 $\pm$ 5.3         |
|              | 500                        | 515.4                      | 103.1 $\pm$ 5.0        | 501.1                      | 100.2 $\pm$ 4.9        |
|              | 750                        | 742.0                      | 98.9 $\pm$ 6.3         | 757.5                      | 101.0 $\pm$ 6.7        |

**Table S2.** Comparison of the proposed method with other distance-based methods of  $\text{Hg}^{2+}$  detection.

| Material              | SD of the measurements (%)                                                                                         | LOD (nM)           | Detection time (min) | Real sample type                          | Reference |
|-----------------------|--------------------------------------------------------------------------------------------------------------------|--------------------|----------------------|-------------------------------------------|-----------|
| DNA                   | <br>0.0688                        | 10                 | 25                   | lake water                                | 1         |
| carbon dots           | <br>250 $\mu\text{g/L}$<br>0.3209 | 29.9               | 40                   | drinking water<br>pond water<br>tap water | 2         |
| DNAzyme               | <br>25 nM<br>0.0599              | 0.23               | 35                   | lake water<br>tap water<br>river water    | 3         |
| dithizone             | <br>0.3237                      | $4.64 \times 10^3$ | N/A                  | whitening cream                           | 4         |
| small molecular probe | <br>0.1420                      | $6.45 \times 10^4$ | 15                   | tap water                                 | This work |



## References

- 1 T. Dong, G. A. Wang, M. W. Li and F. Li, *Anal. Methods*, 2019, **11**, 5376-5380.
- 2 B. Ninwong, P. Sangkaew, P. Hapa, N. Ratnarathorn, R. F. Menger, C. S. Henry and W. Dungchai, *RSC Adv.*, 2020, **10**, 9884-9893.
- 3 C. Wu, G. Gao, K. Zhai, L. Xu and D. Zhang, *Food Chem.*, 2020, **331**, 127208.
- 4 L. Cai, Y. Fang, Y. Mo, Y. Huang, C. Xu, Z. Zhang and M. Wang, *AIP Adv.*, 2017, **7**, 085214.
